# Supplementary material
Source: PubMed Central journal article supplement (PMC5935663)
Supplement: NIHMS478859-supplement-4.pdf [file NIHMS478859-supplement-4.pdf]

## Supplemental Material

**Supplemental Table 1. Univariate Predictors of Mean Response Time in Patients with Heart Failure**

| Variable                                                | Beta-Coefficient | P-value |
|---------------------------------------------------------|------------------|---------|
| Age (years)                                             | -0.17            | 0.291   |
| Gender                                                  | -0.26            | 0.091   |
| β-adrenergic receptor antagonist                        | 0.08             | 0.601   |
| Diuretic, loop                                          | 0.11             | 0.503   |
| ACE inhibitor or ARB                                    | 0.03             | 0.863   |
| Aldosterone blocker                                     | -0.17            | 0.284   |
| Digoxin                                                 | 0.24             | 0.120   |
| Nitrates                                                | -0.17            | 0.271   |
| Cardiac resynchronization therapy                       | -0.08            | 0.593   |
| Hemoglobin (g/dL)                                       | 0.14             | 0.363   |
| RAP, rest (mmHg)                                        | 0.22             | 0.161   |
| PAP, rest (mmHg)                                        | 0.52             | 0.0001  |
| PCWP, rest (mmHg)                                       | 0.59             | <0.0001 |
| MAP, rest (mmHg)                                        | -0.39            | 0.012   |
| Cardiac Output, rest (L/min)                            | -0.30            | 0.056   |
| C[a-v]O <sub>2</sub> , rest (mL O <sub>2</sub> /dL)     | 0.42             | 0.006   |
| Heart rate, rest (bpm)                                  | -0.18            | 0.260   |
| SVR, rest (dynes*s/cm <sup>5</sup> )                    | -0.03            | 0.857   |
| PVR, rest (dynes*s/cm <sup>5</sup> )                    | 0.11             | 0.492   |
| PaO <sub>2</sub> , rest (mmHg)                          | 0.24             | 0.143   |
| PaCO <sub>2</sub> , rest (mmHg)                         | -0.35            | 0.027   |
| pH, rest (units)                                        | 0.31             | 0.056   |
| RVEF, rest                                              | -0.39            | 0.015   |
| LVEF, rest                                              | -0.19            | 0.257   |
| RAP, exercise (mmHg)                                    | 0.31             | 0.046   |
| PAP, exercise (mmHg)                                    | 0.43             | 0.005   |
| PCWP, exercise (mmHg)                                   | 0.42             | 0.006   |
| MAP, exercise (mmHg)                                    | -0.27            | 0.087   |
| Cardiac Output, exercise (L/min)                        | -0.36            | 0.02    |
| C[a-v]O <sub>2</sub> , exercise (mL O <sub>2</sub> /dL) | 0.33             | 0.039   |
| PaO <sub>2</sub> , exercise (mmHg)                      | 0.16             | 0.328   |
| PaCO <sub>2</sub> , exercise (mmHg)                     | -0.38            | 0.018   |
| pH, exercise (units)                                    | 0.29             | 0.078   |
| RVEF, exercise                                          | -0.54            | 0.0007  |
| LVEF, exercise                                          | -0.32            | 0.054   |
| Heart rate, peak( bpm)                                  | -0.03            | 0.841   |

|                                  |       |       |
|----------------------------------|-------|-------|
| Vd/Vt, exercise (%)              | 0.33  | 0.042 |
| Peak VO <sub>2</sub> (ml/kg/min) | -0.31 | 0.007 |
| VE/VCO <sub>2</sub>              | 0.34  | 0.028 |

ACE indicates angiotensin converting enzyme; ARB, angiotensin receptor blocker, bpm, beats per minute; RAP, right atrial pressure; PAP, mean pulmonary artery pressure; PCWP, pulmonary capillary wedge pressure; MAP, mean arterial pressure; C[a-v]O<sub>2</sub>, arterio-venous oxygen content difference; SVR, systemic vascular resistance; PVR, pulmonary vascular resistance RVEF, right ventricular ejection fraction; LVEF, left ventricular ejection fraction; Vd/Vt, dead-space ventilation; VE, total minute ventilation

**Supplemental Table 2. Spearman Correlation Coefficients for MRT and Not Normally Distributed Variables**

| Variable                                                | Spearman $\rho$ | P-value |
|---------------------------------------------------------|-----------------|---------|
| PAP, rest (mmHg)                                        | 0.52            | 0.0005  |
| Cardiac Output, rest (L/min)                            | -0.30           | 0.06    |
| C[a-v]O <sub>2</sub> , rest (mL O <sub>2</sub> /dL)     | 0.42            | 0.006   |
| Heart rate, rest (bpm)                                  | -0.18           | 0.26    |
| SVR, rest (dynes*s/cm <sup>5</sup> )                    | 0.03            | 0.86    |
| PVR, rest (dynes*s/cm <sup>5</sup> )                    | 0.11            | 0.49    |
| RVEF, rest                                              | -0.44           | 0.007   |
| RAP, exercise (mmHg)                                    | 0.32            | 0.04    |
| PAP, exercise (mmHg)                                    | 0.43            | 0.005   |
| PCWP, exercise (mmHg)                                   | 0.39            | 0.011   |
| Cardiac Output, exercise (L/min)                        | -0.36           | 0.02    |
| C[a-v]O <sub>2</sub> , exercise (mL O <sub>2</sub> /dL) | 0.32            | 0.04    |
| PaCO <sub>2</sub> , exercise (mmHg)                     | -0.42           | 0.008   |
| RVEF, exercise                                          | -0.54           | 0.0007  |
| Heart rate, peak( bpm)                                  | -0.08           | 0.63    |

PAP, mean pulmonary artery pressure; C[a-v]O<sub>2</sub>, arterio-venous oxygen content difference; SVR, systemic vascular resistance; PVR, pulmonary vascular resistance; RVEF, right ventricular ejection fraction; RAP, right atrial pressure; PCWP, pulmonary capillary wedge pressure

**Supplemental Table 3. Univariate Predictors of Peak VO<sub>2</sub> in Patients with Heart Failure**

| Variable                                                | Beta-Coefficient | P-value |
|---------------------------------------------------------|------------------|---------|
| Age (years)                                             | -0.31            | 0.05    |
| Gender                                                  | -0.20            | 0.20    |
| β-adrenergic receptor antagonist                        | 0.04             | 0.80    |
| Diuretic, loop                                          | -0.11            | 0.48    |
| ACE inhibitor or ARB                                    | 0.08             | 0.64    |
| Aldosterone blocker                                     | 0.16             | 0.30    |
| Digoxin                                                 | -0.04            | 0.79    |
| Nitrates                                                | 0.19             | 0.22    |
| Cardiac resynchronization therapy                       | 0.18             | 0.25    |
| Hemoglobin (g/dL)                                       | 0.32             | 0.04    |
| RAP, rest (mmHg)                                        | -0.35            | 0.02    |
| PAP, rest (mmHg)                                        | -0.39            | 0.01    |
| PCWP, rest (mmHg)                                       | -0.33            | 0.03    |
| MAP, rest (mmHg)                                        | 0.35             | 0.03    |
| Cardiac Output, rest (L/min)                            | 0.27             | 0.09    |
| C[a-v]O <sub>2</sub> , rest (mL O <sub>2</sub> /dL)     | -0.19            | 0.25    |
| Heart rate, rest (bpm)                                  | 0.19             | 0.24    |
| SVR, rest (dynes*s/cm <sup>5</sup> )                    | -0.02            | 0.92    |
| PVR, rest (dynes*s/cm <sup>5</sup> )                    | -0.20            | 0.20    |
| PaO <sub>2</sub> , rest (mmHg)                          | 0.26             | 0.10    |
| PaCO <sub>2</sub> , rest (mmHg)                         | 0.23             | 0.16    |
| pH, rest (units)                                        | -0.20            | 0.21    |
| RVEF, rest                                              | 0.37             | 0.02    |
| LVEF, rest                                              | 0.16             | 0.34    |
| RAP, exercise (mmHg)                                    | -0.36            | 0.02    |
| PAP, exercise (mmHg)                                    | -0.33            | 0.03    |
| PCWP, exercise (mmHg)                                   | -0.29            | 0.06    |
| MAP, exercise (mmHg)                                    | 0.33             | 0.03    |
| Cardiac Output, exercise (L/min)                        | 0.36             | 0.02    |
| C[a-v]O <sub>2</sub> , exercise (mL O <sub>2</sub> /dL) | -0.02            | 0.91    |
| PaO <sub>2</sub> , exercise (mmHg)                      | 0.12             | 0.47    |
| PaCO <sub>2</sub> , exercise (mmHg)                     | 0.27             | 0.10    |
| pH, exercise (units)                                    | -0.21            | 0.19    |
| RVEF, exercise                                          | 0.40             | 0.02    |
| LVEF, exercise                                          | 0.18             | 0.31    |
| Heart rate, peak( bpm)                                  | -0.13            | 0.43    |
| Vd/Vt, exercise (%)                                     | -0.40            | 0.01    |
| VE/VCO <sub>2</sub>                                     | -0.54            | 0.0003  |

ACE indicates angiotensin converting enzyme; ARB, angiotensin receptor blocker, bpm, beats per minute; RAP, right atrial pressure; PAP, mean pulmonary artery pressure; PCWP, pulmonary capillary wedge pressure; MAP, mean arterial pressure; C[a-v]O<sub>2</sub>, arterio-venous oxygen content difference; SVR, systemic vascular resistance; PVR, pulmonary vascular resistance RVEF, right ventricular ejection fraction; LVEF, left ventricular ejection fraction; Vd/Vt, dead-space ventilation; VE, total minute ventilation
